# Supplementary material for: GPA Peptide-Induced Nur77 Localization at Mitochondria Inhibits Inflammation and Oxidative Stress through Activating Autophagy in the Intestine
Source: Hindawi journal article supplement (doi:10.1155/2020/4964202), 2020-08-21
Supplement: f1 [file 4964202.f1.pdf]

1 Supplementary material

2 1. Supplementary figures

3 2. Supplementary tables

4

5 Figure legends

6 Figure S1 GPA inhibits DSS-induced colitis in vivo

7 Weight of mice during the experiment (A). Disease activity index (DAI) during the  
8 disease process (B). The lengths of colons from each group of mice were measured  
9 (C). \* $p < 0.05$  vs the control group; # $p < 0.05$  vs the DSS-treated group, (n =  
10 6/group).

11

12 Figure S2 GPA inhibits inflammation induced by LPS

13 MODE-K cells were treated with different GPA concentrations for 24 h, and the cell  
14 viability was detected by MTT assay (A). MODE-K cells pre-treated with different  
15 concentrations of GPA for 6 h were exposed to LPS (1  $\mu\text{g/ml}$ ) for 3 h. MCP-1, IL-6  
16 and TNF $\alpha$  mRNA levels were detected by quantitative real-time PCR (B). The results  
17 are expressed as mean  $\pm$  SD, three independent experiments. \* $p < 0.05$ , \*\* $p < 0.01$   
18 and \*\*\* $p < 0.001$  vs the control group; # $p < 0.05$ , ## $p < 0.01$  and ### $p < 0.001$  vs the  
19 LPS-treated group.

20

21 Figure S3 GPA inhibits cytotoxicity and inflammation induced by TNF- $\alpha$

22 MODE-K cells pre-treated with different concentrations of GPA for 6 h were exposed  
23 to TNF- $\alpha$  (10 ng/ml) for 3 h. The cytotoxicity was detected by LDH assay (A).  
24 MCP-1 and IL-6 mRNA levels were detected by quantitative real-time PCR (B). The  
25 results are expressed as mean  $\pm$  SD, three independent experiments. \* $p < 0.05$ , \*\* $p <$   
26 0.01 and \*\*\* $p < 0.001$  vs the control group; # $p < 0.05$ , ## $p < 0.01$  and ### $p < 0.001$   
27 vs the LPS-treated group.

28

29 Figure S4 GPA induces autophagy

30 LC3 levels were analyzed by immunofluorescence in colon tissues of mice. Nur77

(green) and DAPI (blue). Scale bar, 5  $\mu$ m (A). MODE-K cells pre-treated with different concentrations of GPA for 6 h were exposed to TNF- $\alpha$  (10 ng/ml) for 6 h, the protein level of LC3 was analyzed by western blot (B). MODE-K cells pre-treated with different concentrations of GPA for 6 h were exposed to LPS (1  $\mu$ g/ml) for 3 h, mitochondria were separated by Cell Mitochondria Isolation Kit, and the level of LC3 in the mitochondria was detected by western blot (C).

Figure S5 GPA promotes Nur77 interaction with TRAF6 and p62 and induces autophagy.

MODE-K cells were stimulated with GPA (1 mM) for 6 h, followed by LPS (1  $\mu$ g/mL) for 3 h. Mitochondria were separated by Cell Mitochondria Isolation Kit, and the level of COX4,  $\beta$ -tubulin, PCNA in the mitochondria, cell nucleus and cytoplasm were detected by western blot (A). IP and immunoblot analysis of the interaction of endogenous TRAF6 with Nur77 (B). MODE-K cells were transfected with control or p62 - siRNA or TRAF6 - siRNA, MODE-K cells were stimulated with GPA (1 mM) for 6 h, followed by LPS (1  $\mu$ g/mL) for 3 h, levels of p62, TRAF6 and LC3 in cell lysate were analyzed by western blot (CD). Three independent experiments.

Table S1. Primers used for RT-PCR analysis

Table S2. Primers used for siRNA analysis

**Fig. S1**

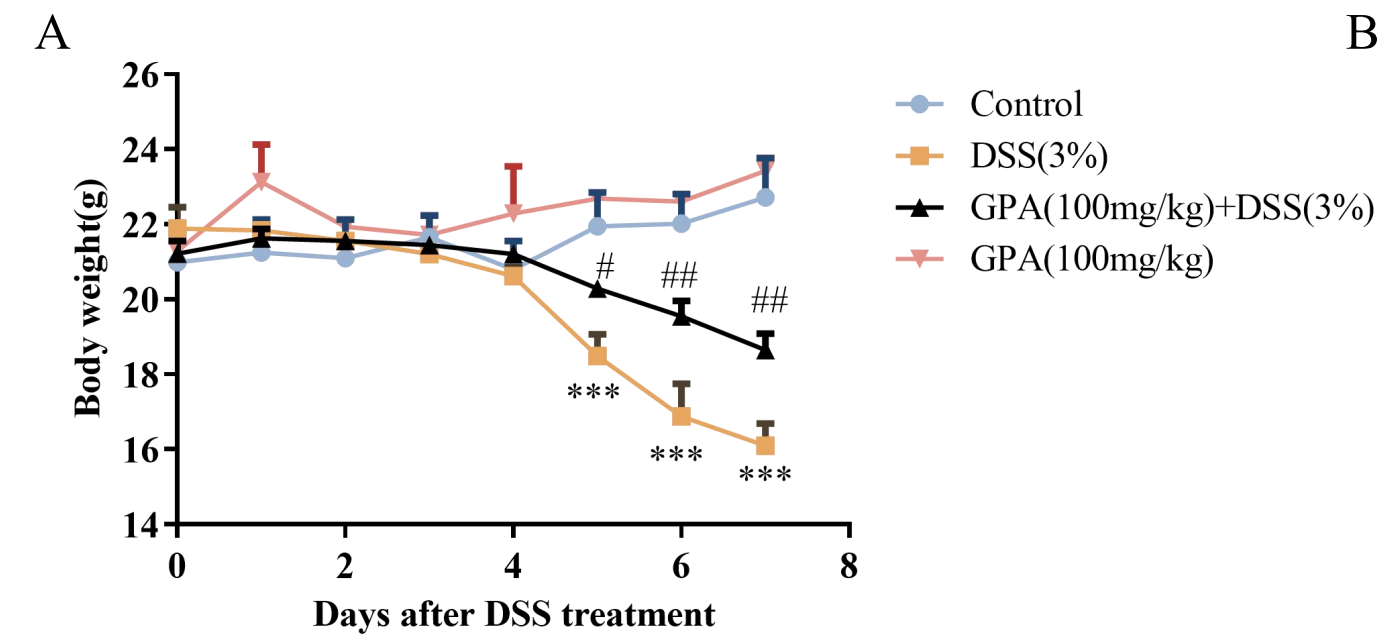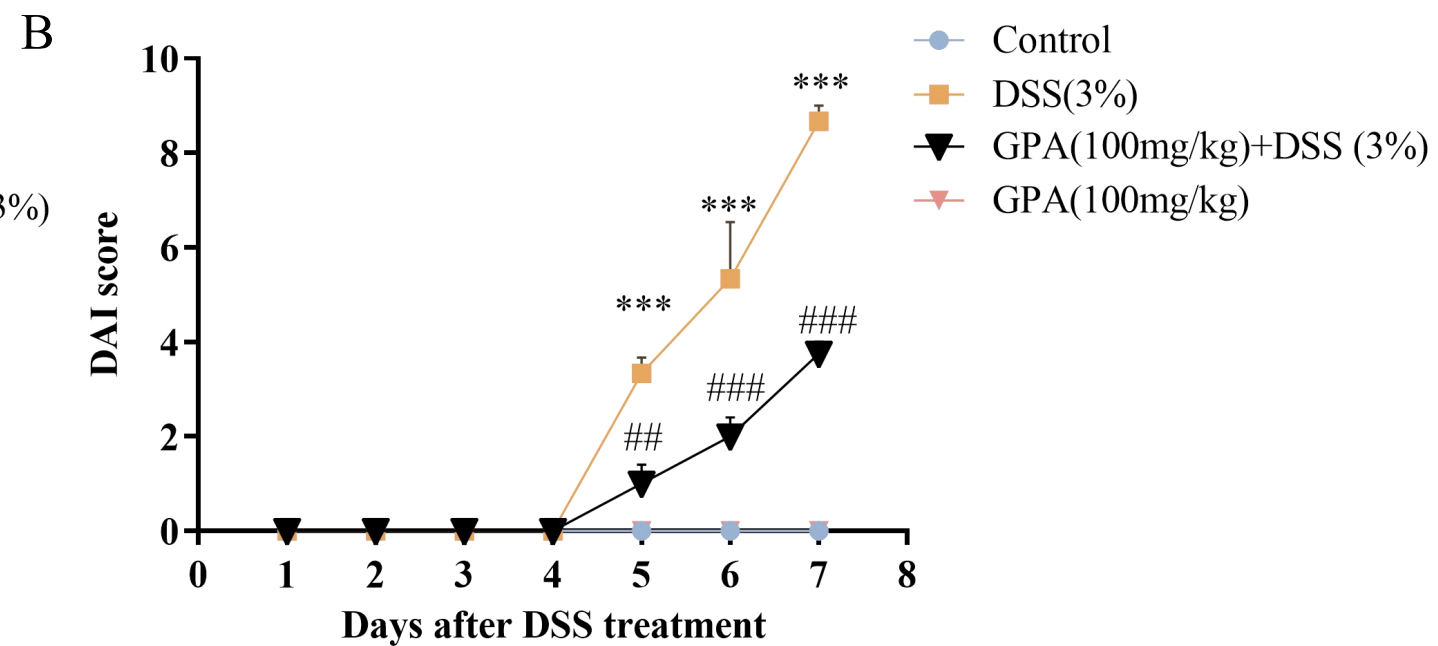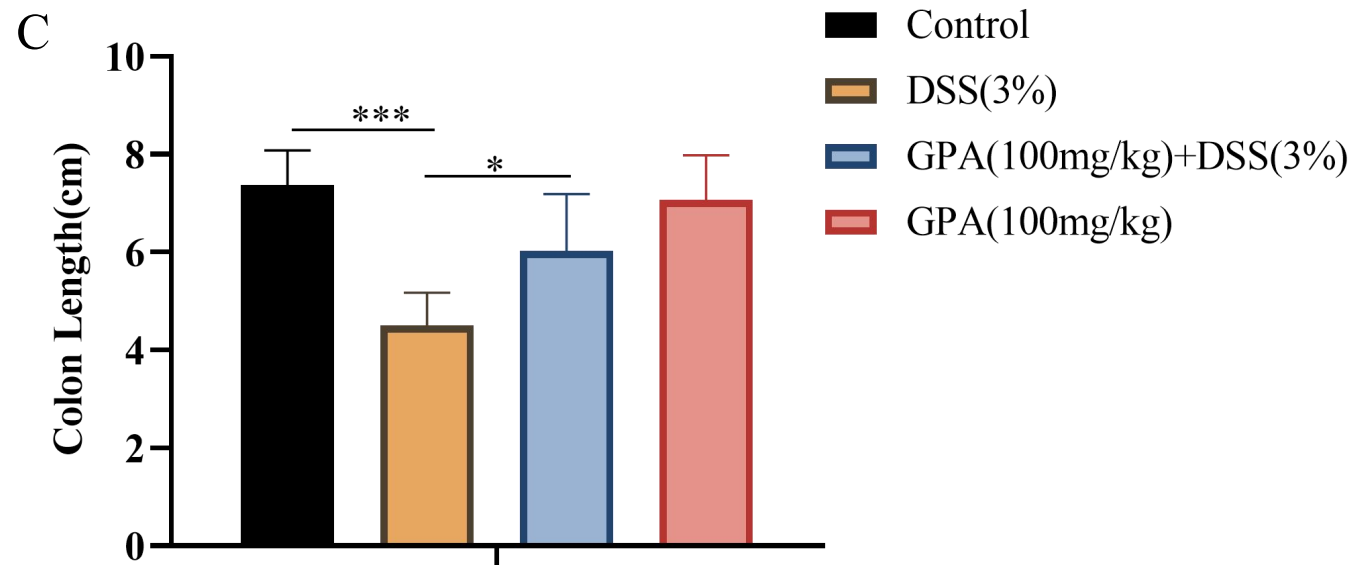

**Fig. S2**

**A**

**MTT**

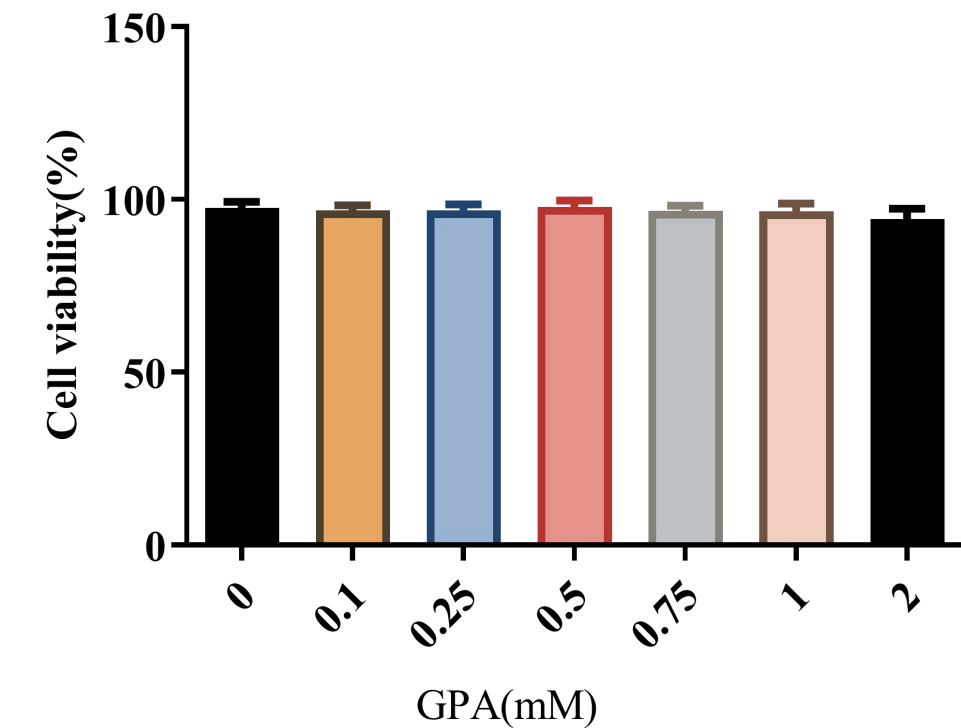

**B**

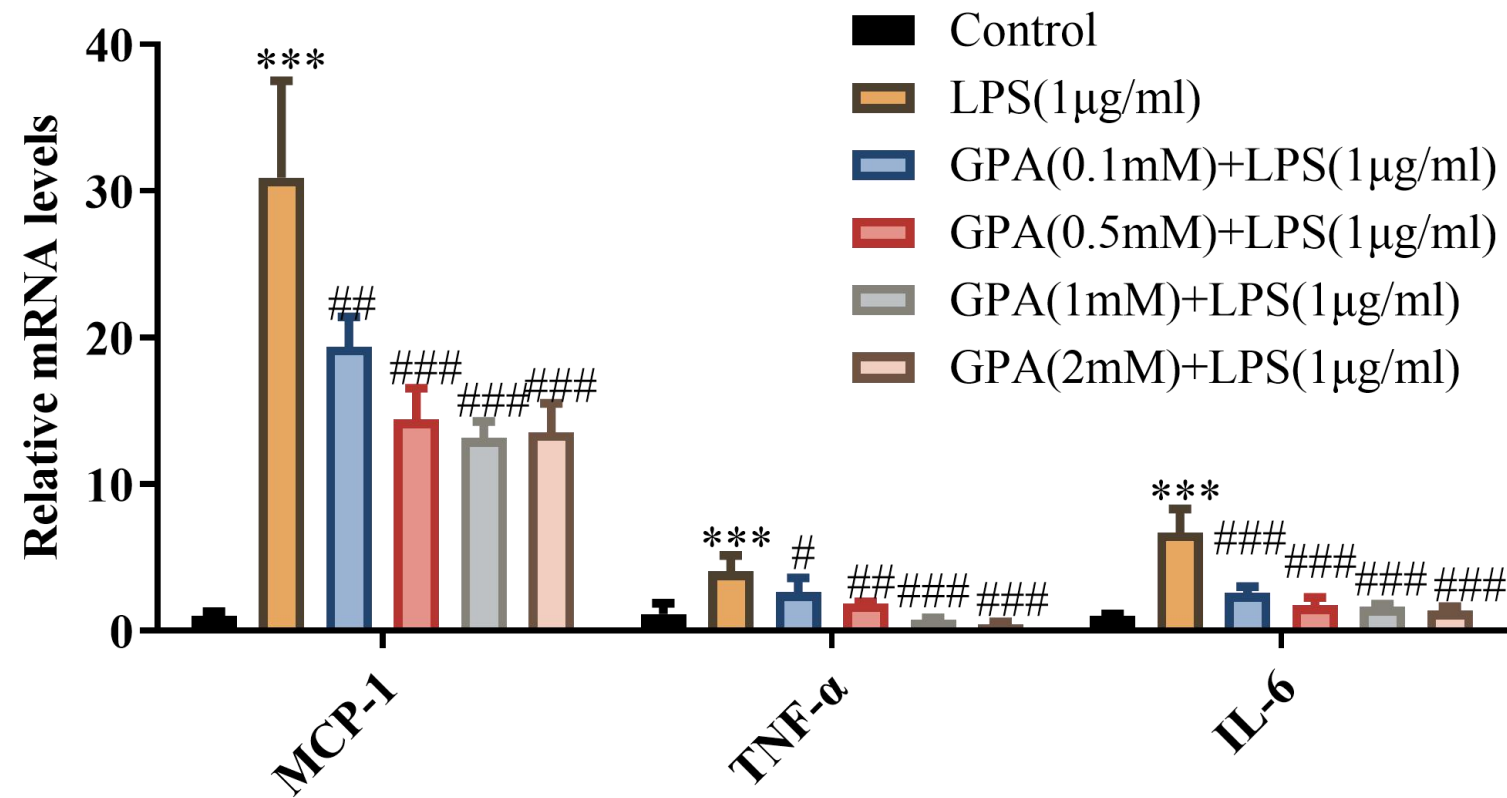

**Fig. S3**

**A**

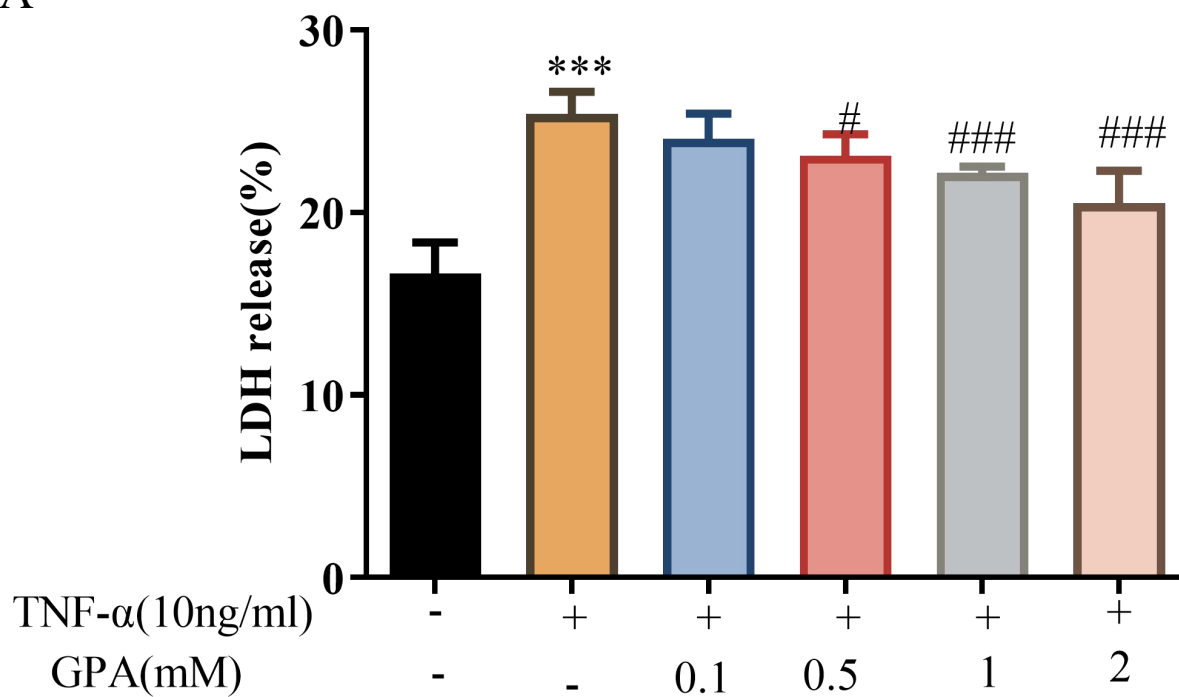

**B**

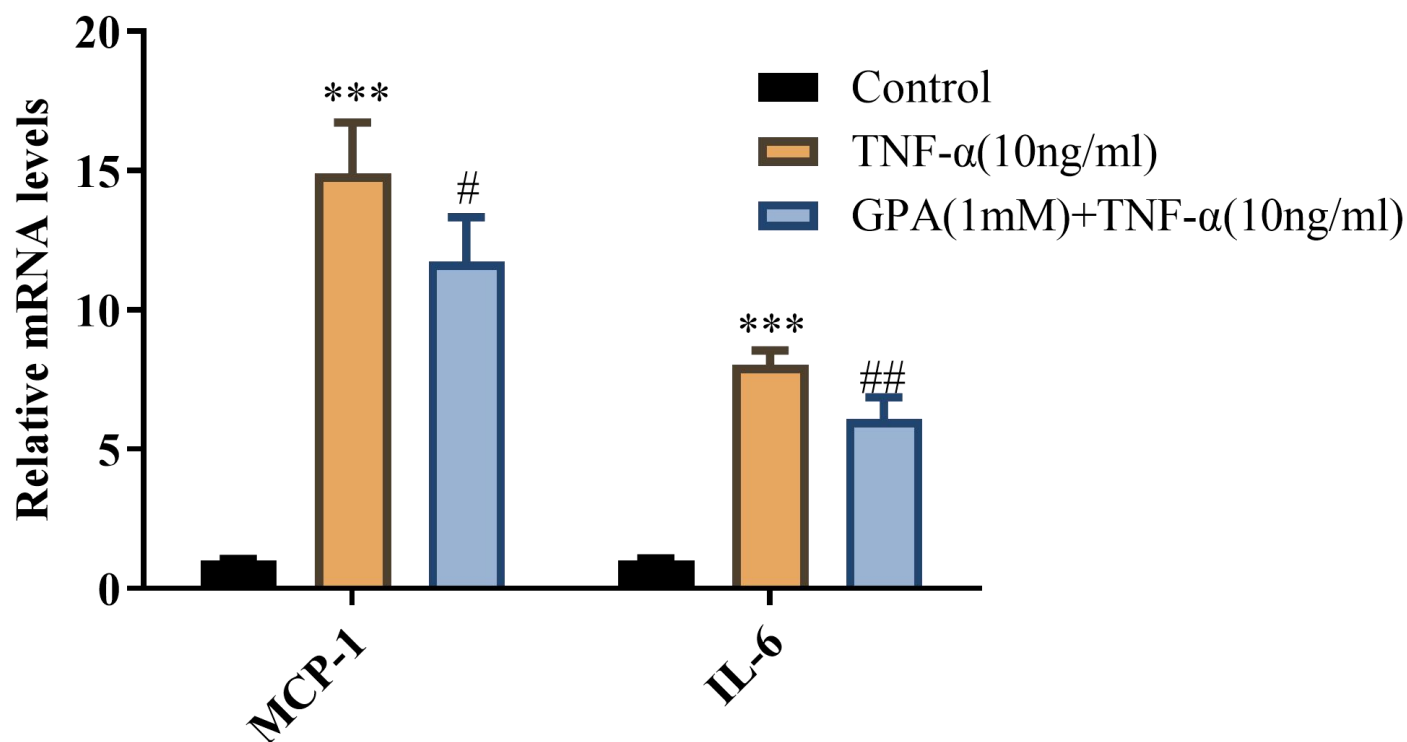

Fig. S4

A

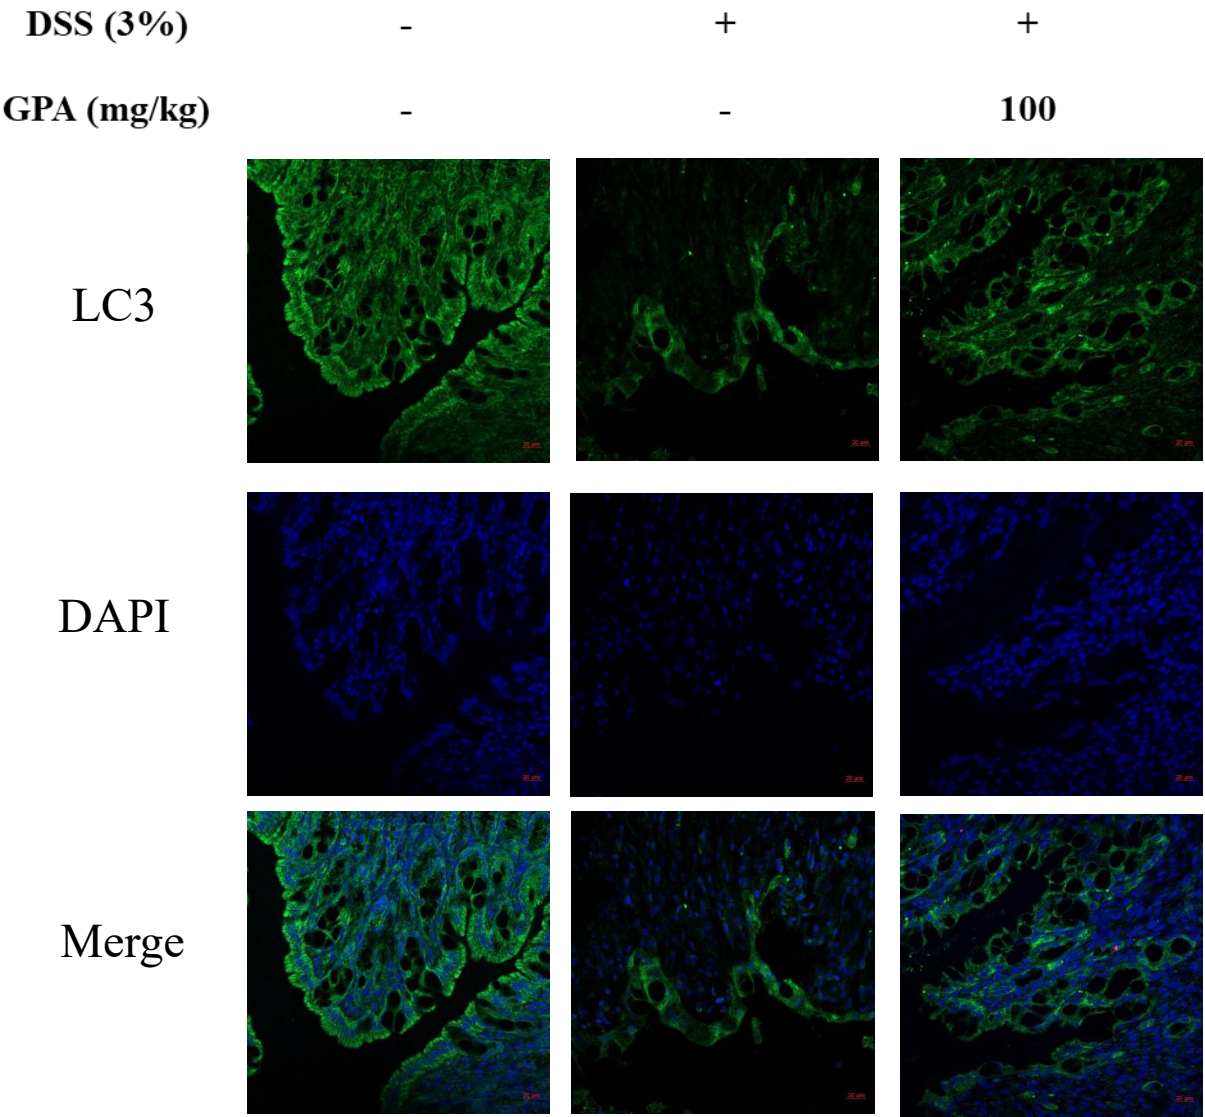

B

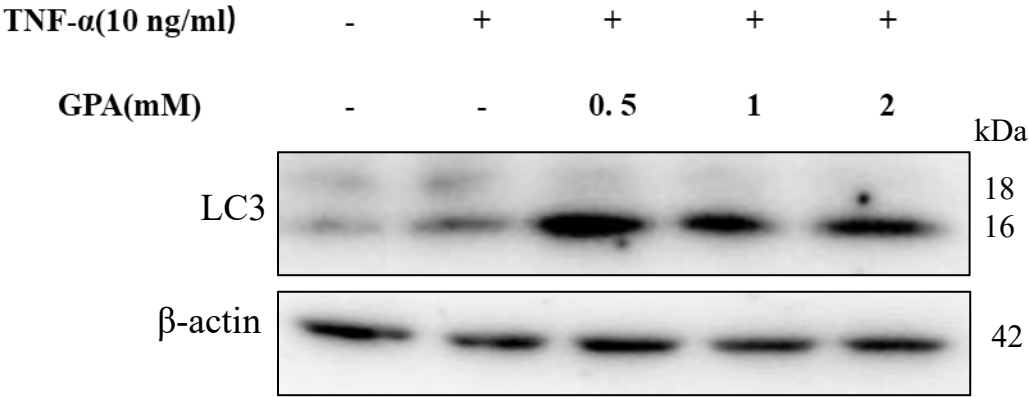

C

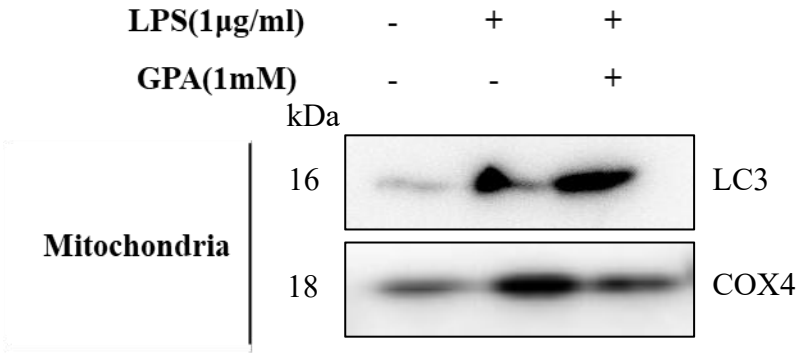

**Fig. S5****A**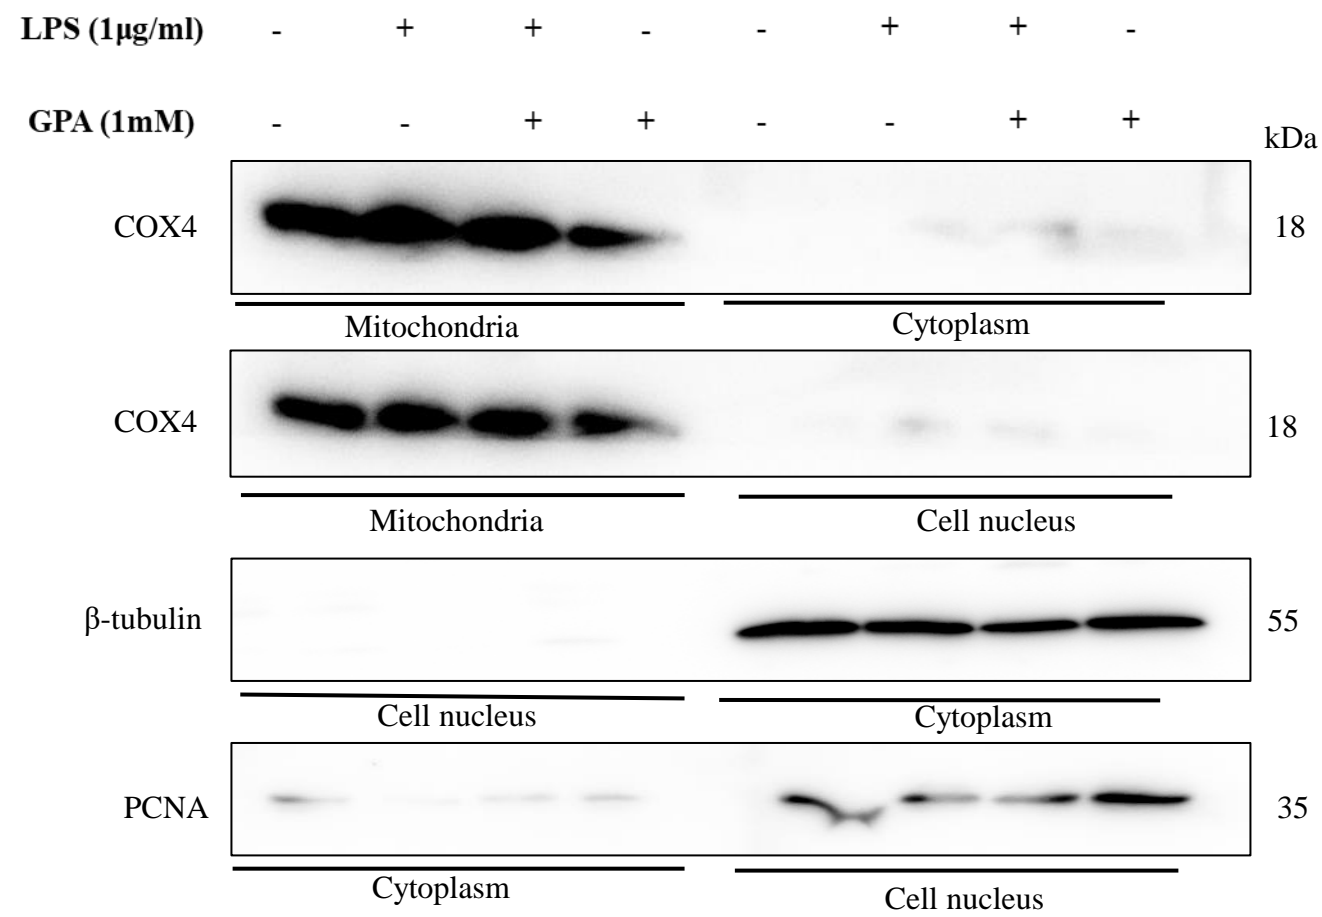**B**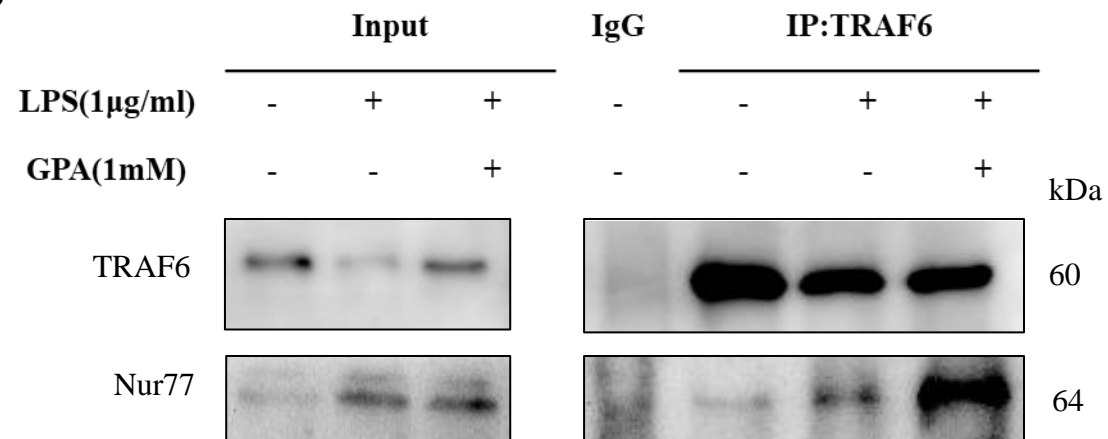**C**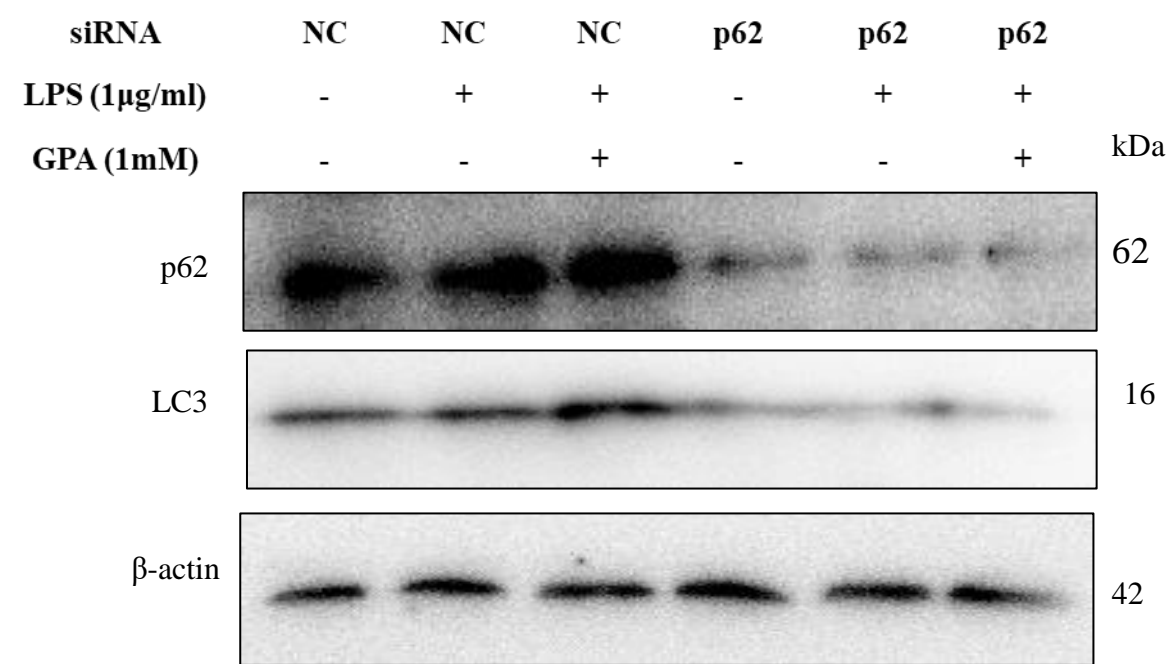**D**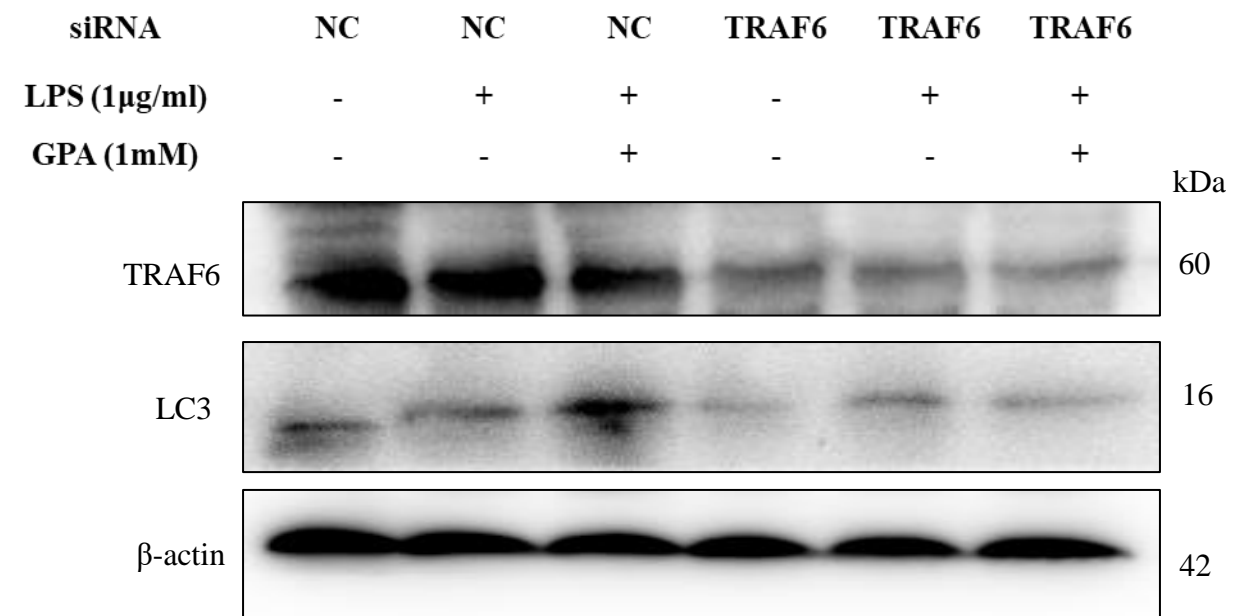

**Table S1. Primers used for RT-PCR analysis**

| Primer            | Primer sequences (5' → 3')                         | Product size (bp) |
|-------------------|----------------------------------------------------|-------------------|
| m- $\beta$ -actin | GGCACCACACCTTCTACAATG<br>GGGGTGTGGAAGGTCTCAAAC     | 133               |
| m-GAPDH           | AACTTTGGCATTGTGGAAGG<br>GGATGCAGGGATGATGTTCT       | 132               |
| m-MCP-1           | AGCACCAGCCAACTCTCAC<br>TCTGGACCCATTCTTCTTG         | 301               |
| m-IL-6            | CCGGAGAGGAGACTTCACAG<br>CAGAATTGCCATTGCACAAC       | 134               |
| m-TNF $\alpha$    | CGGAGTCCGGGCAGGTCTACTTT<br>GTCCAGGTCACTGTCCCAGCATC | 240               |
| m-Nur77           | ATGCTTCGTGTCAGCACTAT<br>GTACTTGGCGCTTTTCTGTA       | 86                |



**Table S2. Primers used for siRNA analysis**

| Primer  | sense (5' → 3')           | antisense (5' → 3')       |
|---------|---------------------------|---------------------------|
| m-Nur77 | CGGCGUCCUUCAAGUUUG<br>ATT | UCAAACUUGAAGGACGCCG<br>TT |
| m-P62   | GCUGAAACAUGGACACUU<br>UTT | AAAGUGUCCAUGUUUCAGC<br>TT |
| m-TRAF6 | GCCAGGUUAAUACACACA<br>UTT | AUGUGUGUAUUAACCUGGC<br>TT |
